# Supplementary material for: Cantharidin inhibits osteosarcoma proliferation and metastasis by directly targeting miR-214-3p/DKK3 axis to inactivate β-catenin nuclear translocation and LEF1 translation
Source: PubMed Central journal article supplement (PMC8315017; doi:10.7150/ijbs.51638), 2021-06-16
Supplement: ijbsv17p2504s1.pdf [file ijbsv17p2504s1.pdf]

### **Supplementary Figure legends**

Supplementary Figure 1. Chemical structure of cantharidin.

Supplementary Figure 2. Nuclear magnetic resonance (NMR) spectrum of cantharidin.

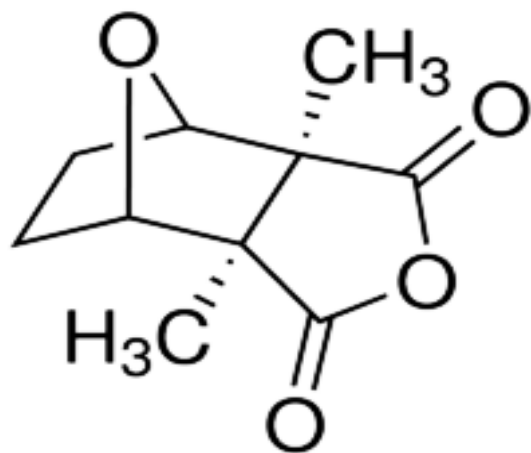

Supplementary Figure 1

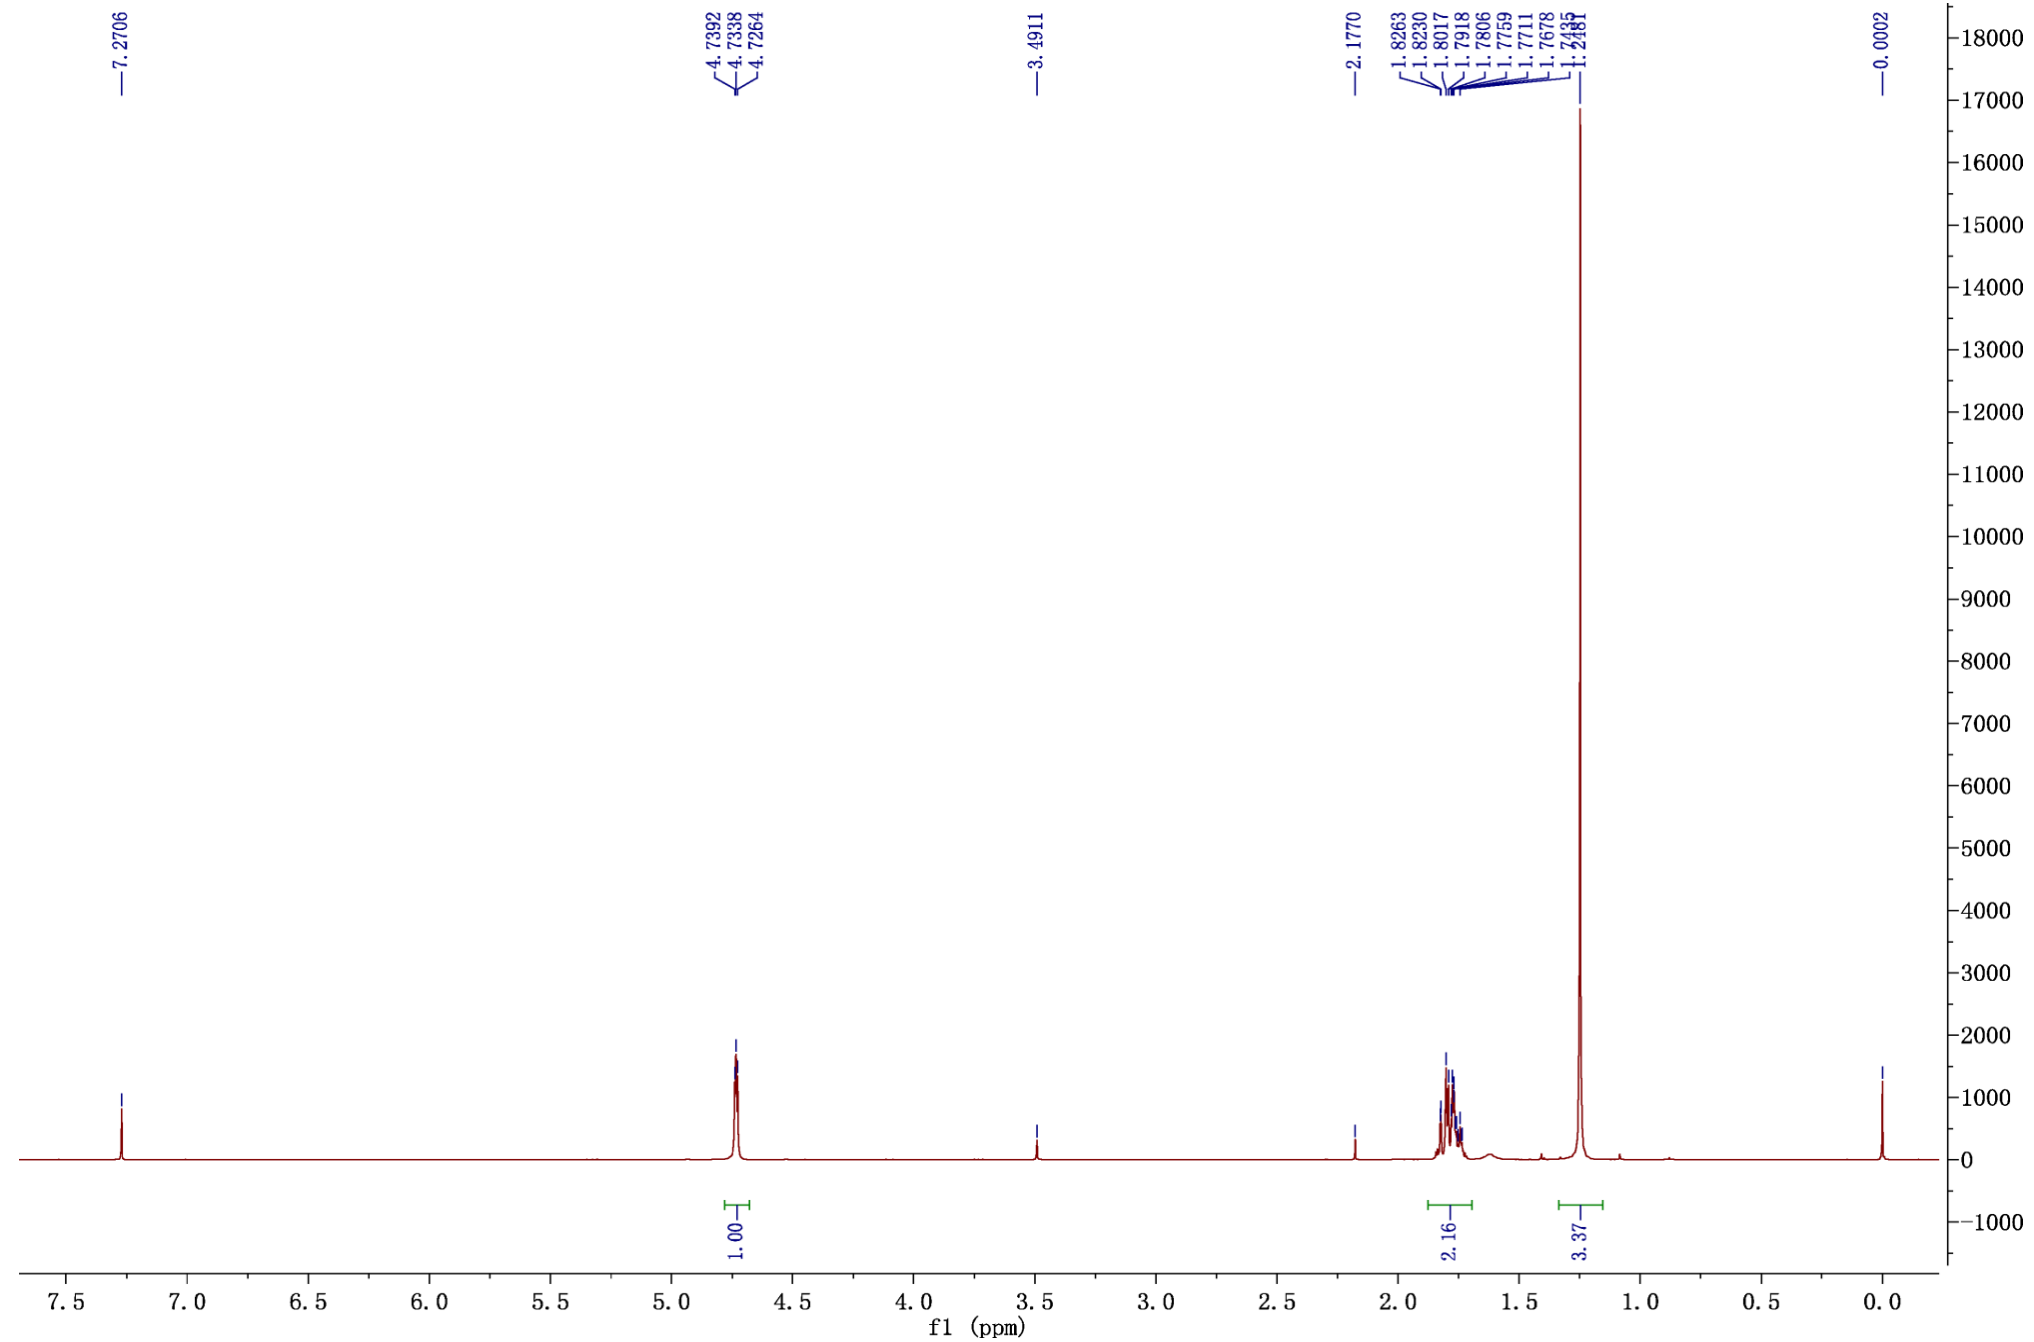

Supplementary Figure 2
